1 **Title**

2 Reduced Frontal Cortical Tracking of Conflict between Selfish versus Prosocial Motives in Narcissistic  
3 Personality Disorder

4

5 **Authors**

6 Dipl.-Psych. David S. Stolz (1,2)<sup>+</sup>, Dr. Aline Vater (3), Dr. Björn H. Schott (4,5), Dr. Stefan Roepke(3)\*, Dr.  
7 Frieder M. Paulus (1,2)\*, Dr. Sören Krach (1,2)\*

8 <sup>+</sup>Corresponding author

9 \*These authors contributed equally

10

11 **Affiliations**

12 1 Social Neuroscience Lab, Department of Psychiatry and Psychotherapy, University of Lübeck, Lübeck,  
13 Germany

14 2 Translational Psychiatry Unit (TPU), Department of Psychiatry and Psychotherapy, University of Lübeck,  
15 Germany

16 3 Charité – Universitätsmedizin Berlin, Campus Benjamin Franklin, Berlin, Germany

17

18 4 Leibniz Institute for Neurobiology Magdeburg, Magdeburg, Germany

19

20 5 Department of Psychiatry, University Medicine Göttingen, Göttingen, Germany

21

22 **Corresponding author**

23 David S. Stolz

24 Social Neuroscience Lab

25 Center of Brain, Behavior, and Metabolism (CBBM)

26 Universität zu Lübeck

27 Ratzeburger Allee 160

28 23562 Lübeck

29 Phone: +49 451 3101 7528

30 Email: david.stolz[at]uni-luebeck.de

31

32 **Short title**

33 Prosociality in Narcissistic Personality Disorder

34

35 **Abstract**

36 Narcissistic Personality Disorder (NPD) entails severe impairments in interpersonal functioning that are  
37 likely driven by selfish and exploitative behavior. Here, we investigate the underlying motivational and  
38 neural mechanisms of prosocial decision-making by experimentally manipulating motivational conflict  
39 between selfish and prosocial incentives. One group of patients diagnosed with NPD and a group of healthy  
40 controls (CTL) were scanned using functional magnetic resonance imaging while performing a prosocial  
41 decision-making task. In this task, we systematically varied the level of conflict between selfish and  
42 prosocial options on each trial. We analyzed choice behavior, response times, and neural activity in regions  
43 associated with conflict monitoring to test how motivational conflict drives prosocial choice behavior.  
44 Participants in the NPD group behaved less prosocially than the CTL group overall. Varying degrees of  
45 motivational conflict between selfish and prosocial options induced response variability in both groups,  
46 but more so in the CTL group. The NPD group responded faster than the CTL group, unless choosing  
47 prosocially, which slowed response times to a level comparable to the CTL group. Additionally, neural  
48 activity tracking motivational conflict in dorsomedial prefrontal cortex was reduced in the NPD group.  
49 Collectively, low generosity in NPD appears to arise from reduced consideration of prosocial motives,  
50 which obviates motivational conflict with selfish motives and entails reduced activity in neural conflict  
51 monitoring systems. Yet, our data also indicate that NPD is not marked by an absolute indifference to  
52 others' needs. This points to potentials for improving interpersonal relationships, effectively supporting  
53 the well-being of patients and their peers.

54

55 **Introduction**

56 Narcissistic personality disorder (NPD) is characterized by a pervasive pattern of grandiosity, need  
57 for admiration, and lack of empathy[1]. Relationships in patients with NPD are described as largely  
58 superficial and serving as a means for self-esteem regulation, rather than being motivated by mutuality  
59 and genuine interest in the other person[1]. Most of these descriptive interpersonal features derive from  
60 clinical observations. Laboratory studies that prove these concepts using experimental designs are  
61 lacking[2]. The aim of this study was to investigate selfish behavior, a key interpersonal pattern in NPD, on  
62 a behavioral and neural level.

63 “Narcissism” can be conceptualized as a dimensional personality trait including grandiose and  
64 vulnerable features[3,4]. Grandiose features are also reflected in the descriptive DSM-5 criteria set of  
65 NPD[1] and include an exaggerated sense of self-importance and need for admiration. Vulnerable features  
66 include traits such as anger, shame, and insecurity[3]. A pervasive motif of grandiose narcissism is to  
67 maintain an exaggerated self-esteem, which is reflected in social behavior[5,6]. Non-clinically grandiose  
68 individuals overestimate their abilities[7], tend to be extraverted[8], and display interpersonal skills like  
69 charmingness[9,10], which presumably facilitates making new acquaintances[6,11,12]. In the long run,  
70 however, non-clinical grandiosity predicts more detrimental outcomes[5,12] reflected in antagonistic and  
71 defensive behavior[9,13,14], vindictiveness[15,16], and dysfunctional relationships[17,18]. Non-clinical  
72 narcissistic vulnerability similarly relates to defensiveness and self-enhancement[10], but also to  
73 emotional instability, low extraversion[19], low self-esteem[20], and aggression[21]. Most behavioral  
74 studies on “narcissism” are performed in non-clinical samples using the Narcissism Personality Inventory  
75 (NPI) that mainly captures grandiose features of the construct[21], making the transferability of these data  
76 into clinical samples disputable[22]. Pathological narcissism likely represents a singular dimension, with  
77 NPD as an extreme[23] that is linked to reduced empathy[24,25], and distress of close others[26].

78 In healthy subjects, laboratory studies have shown that higher trait narcissism predicts higher  
79 individual acquisitiveness but diminishes the group’s total harvest in common goods games[27]. Similarly,

80 trait vulnerability predicts reduced generosity, lower sensitivity to potential punishment for low  
81 generosity, and increased retaliation[28]. This coheres with classic findings that non-clinical grandiosity  
82 predicted aggression, especially following self-esteem threats[29]. Yet, when prosocial motives gain  
83 salience through empathizing or perspective taking, both selfishness[30–32] and aggression[31,33]  
84 diminish in healthy individuals, and the arising arbitration between selfish and prosocial motives entails  
85 slower reaction times (RTs)[34–37]. Habitually selfish/prosocial individuals respond quickly when behaving  
86 selfishly/prosocially, whereas deviations from default behavior are slower[36]. Hence, to the extent that  
87 individuals inform their behavior by reconciling opposing interpersonal motives, experimentally induced  
88 conflict between such motives should slow down responses and potentially shift them away from default  
89 tendencies[34,36].

90         Regarding NPD, this evidence from non-clinical samples stimulates divergent hypotheses: Either,  
91 pronounced selfish behavior, as also frequently observed in non-clinical narcissism[27–29], could go along  
92 with low motivational conflict if selfish motives trump prosocial motives. Alternatively, if interpersonal  
93 deliberation in NPD entails motives like being perceived as likeable or attractive[9,10], achievable for  
94 instance through generous actions, eventually selfish behavior should demand to first resolve conflict with  
95 co-existing prosocial motives. In the first hypothesis, low motivational conflict should be reflected in fast  
96 RTs, whereas the second hypothesis would predict slower RTs[34,36].

97         Neurally, motivational conflict should relate to activity in areas of medial prefrontal cortex, such  
98 as dorsomedial prefrontal cortex (dmPFC), anterior cingulate cortex (ACC), and the supplementary motor  
99 complex (SMC, including supplementary motor area (SMA), and preSMA)[38]. These regions are commonly  
100 associated with cognitive control[39,40], which also holds in the social domain[41–43]. Further, since  
101 ventromedial prefrontal cortex (vmPFC) is associated with subjective value computations of competing  
102 choice options[44] and action outcomes[45], activity in this region may also contribute to reduced  
103 prosocial decision making in NPD. Moreover, the vmPFC tracks state self-esteem[46,47], social inequality  
104 assessment[48,49], and guides prosocial behavior in concert with the temporoparietal junction

105 (TPJ)[37,50,51]. The TPJ includes regions at the border of temporal and parietal lobes including superior  
106 temporal sulcus (STS) and angular gyrus (AG)[52], implicated in higher-level social-cognitive  
107 processes[53,54] such as moral judgement[55] or perspective taking[30]. Last, the anterior insula (AI) is  
108 involved in interoceptive awareness[56], empathic processes[30,57], detection of social norm  
109 violations[42]. Together with ACC, it serves the neural processing of interpersonal motives[58].

110           Here, patients diagnosed with NPD and a group of healthy control subjects (CTL) were scanned  
111 using functional magnetic resonance imaging (fMRI) during a prosocial decision-making task. On each trial,  
112 participants had two options to split a monetary endowment between themselves and an unknown  
113 recipient. The splits systematically varied to manipulate the level of conflict between selfish and prosocial  
114 motives. Additionally, some trials allowed punishing the recipient by taking money from them. Concluding  
115 from previous studies in non-clinical samples with narcissistic traits [27–29], we expected lower generosity  
116 in the group of patients diagnosed with NPD than in CTL group, reflecting their decision making to be  
117 eventually governed by selfish motives. Additionally, we expected activity in neural conflict monitoring  
118 systems (i.e. dmPFC, ACC, SMC)[39] and differential RT patterns[34,36] to track the motivational conflict  
119 implied in the offer, potentially allowing to differentiate patients with NPD from CTL subjects.

120 **Methods**

121 **Sample**

122 A total of N=42 participants were included in the study. Participants belonging to the NPD group  
123 were recruited from Charité - Universitätsmedizin Berlin, Campus Benjamin Franklin, and were both  
124 inpatients and outpatients, but were included in the study only after being discharged from treatment.  
125 CTL group participants were recruited by announcements in the press and via publicly placed  
126 advertisements. The study was approved by the local ethics committee at Charité Berlin (EA4/092/10).  
127 Participants gave written informed consent and received monetary compensation for participating in the  
128 study. Structured Clinical Interviews for DSM IV axes I and II Disorders (SCID-I; SCID-II; 60,61; German  
129 Versions: 62,64) were administered to all participants by a trained clinical psychologist to validate NPD  
130 diagnosis and assess comorbidity (Supplementary Table 1). Potential participants for the CTL group were  
131 excluded if completion of SCID-I or SCID-II indicated the presence of any mental disorder. As assessed in  
132 prior studies of our group, interrater reliability ( $\kappa=0.80$ ) and internal consistency (Cronbach's  $\alpha=0.86$ ; sum  
133 of criteria) of SCID-II NPD diagnoses was acceptable [63]. Five participants were excluded from the analysis  
134 due to various reasons (Supplementary Methods), leaving a total of 37 participants (CTL: n=19, NPD: n=18)  
135 in the final analysis sample.

136

137 **Procedure**

138 Before the study, a set of paper-pencil questionnaires were sent to all participants (Supplementary  
139 Table 1). Upon arrival at the MRI facility, all participants were briefed about the study protocol and gave  
140 written informed consent. They were informed that inside the MRI they were going to repeatedly decide  
141 how to share an endowment of 1000 points (equivalent to 10 €) between themselves and another person  
142 (henceforth: recipient) by choosing between two alternative splits of this endowment. To ensure  
143 interpersonal relevance of the task, they were informed that after task completion, a number of their  
144 choices would be selected randomly, defining how much money would be paid to them and to the next

145 study participant (i.e. the recipient). Additionally, participants received money based on the choices of one  
146 other participant who was assigned randomly. All participants were tested alone and never met any other  
147 participant.

148

## 149 **Experimental Task**

150 Stimulus presentation was performed using the *Presentation* software package (Neurobehavioral  
151 Systems, Albany, CA). On each trial, one option was displayed on the left and the other on the right side  
152 of the screen, with the amounts for the participant and the recipient on the top and the bottom,  
153 respectively (Figure 1). Participants chose by pressing a button with either the index or the middle finger.  
154 In a baseline (BL) condition, both options assigned precisely 500 points to each person. In five other  
155 conditions the level of conflict between selfish and prosocial motives was manipulated by systematically  
156 splitting the endowment, with one option favoring the participant more strongly (selfish option) than the  
157 other option (prosocial option). In one condition, options were very similar, inducing low motivational  
158 conflict (low conflict, LC). On other trials, one option assigned a high payoff to the participant, leaving little  
159 to the recipient, whereas the other option proposed a fairer split (medium conflict, MC). Still other trials  
160 did not allow to resolve motivational conflict this way, because avoiding selfishness required to choose an  
161 extremely prosocial option (high conflict, HC). Further, one condition allowed participants to increase their  
162 gain by subtracting money from the recipient, or to resort to a fairer split (medium conflict punishment,  
163 MCP). Finally, one condition also allowed participants to increase their payoff at the recipient's cost, but  
164 the alternative would be to choose an extremely prosocial option (high conflict punishment, HCP). On each  
165 trial, following 500 ms fixation, a choice had to be made within the 3000 ms display of the options,  
166 otherwise the trial was coded as invalid. Each trial onset was triggered by an MRI pulse, and the inter-trial-  
167 interval (ITI) was jittered between 500 and 6500 ms in steps of 2000 ms (further information in  
168 Supplementary Methods).

169

## 170 **Statistical analyses of behavioral data**

171 Statistical analyses of behavioral data were performed using JASP[64], jamovi[65], and the  
172 p.adjust() function in R[66]. We analyzed percentages of prosocial choices and median RTs for the different  
173 experimental conditions using repeated measures analysis of variance (ANOVA) and nonparametric tests,  
174 as appropriate. Since both choice options in the BL condition offered the same amount of 500 points to  
175 the player and the recipient, no selfish or prosocial option was defined and BL choice data were not  
176 analyzed. However, RTs from the BL condition were analyzed and it served as an explicit baseline for the  
177 analysis of fMRI data. To test the effects of increasing motivational conflict on behavior and neural activity,  
178 we compared HC trials against the average of LC and MC trials (LC&MC), because the latter both allowed  
179 to resolve the conflict with the same pro-social option in which the participant still received more payoff  
180 but amounts were rather similar (i.e. 550 and 450, respectively). This was not the case in the HC condition,  
181 in which the pro-social option implied a relative loss for the participant and gain for the recipient (200 and  
182 800, respectively). Last, to test the main effect of possible punishment, we averaged MCP and HCP trials  
183 (PUN) and compared this to the average of MC and HC trials (noPUN).

184

## 185 **fMRI data acquisition and preprocessing**

186 Echo-planar images (EPIs) were acquired on a Magnetom TrioTim Syngo (Siemens, Munich,  
187 Germany). The entire run consisted of 600 EPIs (37 ascending slices; 20% gap; 3\*3\*3 mm voxels; TR=2000  
188 ms; TE=30 ms; FA=70°; FoV=192; GRAPPA=2). Additionally, a high-resolution T1-weighted MPRAGE image  
189 (176 ascending slices; 50% gap; 1\*1\*1 mm voxels; TR=1900 ms; TE=2.52 ms; FA=9°; FoV=256; GRAPPA=2)  
190 was acquired to improve spatial normalization. All fMRI data were preprocessed and analyzed using SPM  
191 12[67] in Matlab R2019b (The Mathworks, Natick, Massachusetts, USA). EPIs were corrected for  
192 acquisition delay (slice timing), with the middle slice as reference, and for head motion (realignment). The  
193 MPRAGE image was coregistered to the mean EPI obtained from realignment and segmented using the  
194 unified segmentation algorithm implemented in SPM. EPIs were normalized to a common stereotactic



195 reference frame (MNI) space using the transformation parameters obtained from segmentation, and  
196 smoothed using an 8 mm full-width-at-half-maximum isotropic Gaussian kernel.

197

### 198 **Statistical analysis of fMRI data**

199 All fMRI data were analyzed using SPM12[67], using a two-stage mixed effects model. The first-  
200 level general linear model (GLM) contained six regressors of interest, one for the BL condition and one for  
201 each of the Choice conditions, plus the six rigid-body movement parameters obtained from realignment  
202 as regressors of no interest, to account for variance related to head motion, and a single constant. At the  
203 second level, we constructed a full-factorial ANOVA model, which included the contrast images of each  
204 Choice condition against the BL condition (e.g. HC>BL), separated by group, resulting in the within-subjects  
205 factor *condition* with five levels, and the between-subjects factor *group* (CTL, NPD).

206 To test for within-subject effects of RTs and prosocial choices, respectively, we set up two  
207 additional GLMs for each participant. Within each GLM, we modelled BL trials separately from Choice  
208 trials, and parametrically modulated, in this order, the latter with dummy predictors that indicated  
209 whether medium (MC, MCP) or high (HC, HCP) conflict trials were presented, and whether or not a given  
210 trial was a PUN trial (i.e., MCP, HCP). Last, we included either a predictor indicating the participant's choice  
211 (prosocial=1; selfish=-1), or the RT on each trial (log-transformed and z-scored). Parametric modulators  
212 were orthogonalized. Additional regressors modelled invalid trials and head motion. One participant in the  
213 CTL group and three participants in the NPD group never chose the prosocial option and were therefore  
214 excluded from these analyses.

215

### 216 **Region-of-Interest Analysis**

217 Since our primary focus was to investigate how motivational conflict engages regions associated  
218 with conflict monitoring, we used Neurosynth[68] to perform an automated meta-analysis of functional  
219 neuroimaging studies by searching for the term “conflict” and obtaining the association test map

220 thresholded at  $p < .01$  (false-discovery-rate-corrected; 337 studies). This map was then limited to include  
221 only clusters of 5 or more contiguous voxels and used as a region-of-interest, largely covering dorsal ACC,  
222 SMC, and aspects of bilateral AI (henceforth: *conflict mask*).

223  
224  
225  
226  
227  
228  
229  
230  
231  
232  
233  
234  
235  
236  
237  
238  
239  
240  
241  
242  
243  
244  
245  
246  
247

## Results

### Participants in NPD Group Acted More Selfishly, but Avoided Punishing Recipients

Across all Choice conditions, the NPD group ( $MD=9.80\%$ ,  $IQR=24.13\%$ ,  $min=0.0\%$ ,  $max=97.81\%$ ) chose the prosocial option less often than the CTL group ( $MD=45.20\%$ ,  $IQR=34.74\%$ ,  $min=0.0\%$ ,  $max=86.41\%$ ; Mann-Whitney-U test:  $W=260.5$ , one-sided  $p=.003$ , rank-biserial correlation= $0.52$ ,  $90\% CI=[0.26;0.72]$ ; Figure 2 & Table 1).

When motivational conflict was low, the CTL group behaved more prosocially than the NPD group (LC&MC, CTL group:  $MD=51.11\%$ ,  $IQR=59.53$ ; NPD group:  $MD=3.97\%$ ,  $IQR=24.58$ ;  $W=266.5$ , one-sided  $p=0.002$ , rank-biserial correlation= $0.56$ ,  $90\% CI=[0.30;0.74]$ ). When conflict increased, prosocial choices diminished in both groups (difference: LC&MC minus HC; CTL group:  $MD=29.69\%$ ,  $IQR=46.40$ ,  $W=171.00$ ,  $p<.001$ ; NPD group:  $MD=1.20\%$ ,  $IQR=5.43$ ,  $W=100.5$ ,  $p=.003$ ), and this effect was larger in the CTL group ( $W=288.50$ , two-sided  $p<.001$ , rank-biserial correlation= $0.69$ ,  $95\% CI=[0.43;0.84]$ ). However, under HC, the CTL group still behaved more prosocially than the NPD group (CTL:  $MD=15.22\%$ ,  $IQR=25.65\%$ ; NPD:  $MD=0.00\%$ ,  $IQR=22.23\%$ ;  $W=229$ , one-sided, Holm-corrected  $p=0.046$ , rank-biserial correlation= $0.34$ ,  $90\% CI=[0.04;0.59]$ ). Thus, the difference in prosociality between the groups was reduced, but still present, when prosocial behavior was very disadvantageous for the participant.

Across groups, prosociality increased when selfishness required to punish the recipient (difference PUN minus noPUN, CTL:  $MD=26.37\%$ ,  $IQR=48.80$ ,  $W=158$ , one-sided  $p<.001$ , rank-biserial correlation= $0.85$ ,  $90\% CI=[0.67;0.93]$ ; NPD:  $MD=1.63\%$ ,  $IQR=32.15$ ,  $W=87$ , one-sided  $p=.016$ , rank-biserial correlation= $0.66$ ,  $95\% CI=[0.28;0.86]$ ). This increase was descriptively, but not significantly, larger in the CTL than in the NPD group ( $W=219$ , one-sided  $p=.074$ , rank-biserial correlation= $0.28$ ,  $90\% CI=[-0.03;0.54]$ ). Hence, having to punish others for one's own benefit led to more prosocial behavior.

248 **Responses in NPD Group were Fast, but Slowed Down for Prosocial Decisions**

249 RTs did not generally differ between groups (ANOVA with factors trial type [BL, Choice] and group [CTL,  
250 NPD]:  $F(1,35)=3.39$ ,  $p=.074$ ,  $\eta_p^2=.09$ ). However, there was a significant main effect of trial type  
251 ( $F(1,35)=37.15$ ,  $p<.001$ ,  $\eta_p^2=.52$ ), that was modulated by group (trial type\*group interaction:  $F(1,35)=11.09$ ,  
252  $p=.002$ ,  $\eta_p^2=.24$ ; Figure 2). Post-hoc tests showed that the CTL group responded slower during Choice trials  
253 ( $t(54.2)=3.21$ , two-sided  $p_{Holm}=.009$ ), but there was no difference during BL trials ( $t(54.2)=0.02$ , two-sided  
254  $p_{Holm}=.987$ ). Moreover, motivational conflict slowed RTs in the CTL group (Choice>BL:  $t(35)=6.76$ ,  
255  $p_{Holm}<.001$ ), but not in the NPD group ( $t(35)=1.93$ ,  $p_{Holm}=.186$ ). Thus, both groups responded comparably  
256 fast unless interpersonal motives needed to be reconciled, which slowed responding only in the CTL group.

257 Median RTs did not differ between selfish and prosocial decisions across groups (ANOVA with  
258 factors decision [selfish, prosocial] and group [CTL, NPD]: no main effect of decision:  $F(1,31)=4.03$ ,  $p=.054$ ,  
259  $\eta_p^2=.12$ ; factor group:  $F(1,31)=2.91$ ,  $p=.098$ ,  $\eta_p^2=.09$ ). However, the effect of decision differed between  
260 groups (decision\*group:  $F(1,32)=8.56$ ,  $p=.006$ ,  $\eta_p^2=.22$ ; Figure 3), showing that the CTL group was slower  
261 than the NPD group during selfish choices (CTL>NPD:  $t(49.2)=2.93$ ,  $p_{Holm}=.026$ ; Figure 3), but not during  
262 prosocial choices (CTL>NPD:  $t(49.2)=0.03$ ,  $p_{Holm}=1.000$ ). Moreover, RTs within the CTL group did not differ  
263 between decisions ( $t(31)=0.68$ ,  $p_{Holm}=1.000$ ), but the NPD group was faster for selfish than for prosocial  
264 decisions ( $t(31)=-3.34$ ,  $p_{Holm}=.013$ ), which was not due to group-specific effects of the experimental  
265 conditions (Supplementary Table S4).

266 RTs were insensitive to level of motivational conflict across groups (ANOVA with factors level of  
267 conflict [LC&MC, HC] and group [CTL, NPD]:  $F(1,35)=1.86$ ,  $p=.181$ ,  $\eta_p^2=.05$ ). Yet, we found a main effect of  
268 group ( $F(1,35)=8.53$ ,  $p=.006$ ,  $\eta_p^2=.20$ ), that was driven by the HC condition (CTL>NPD:  $t(35)=3.21$ ,  
269  $p_{Holm}=.017$ ). The interaction of both factors was not significant ( $F(1,35)=3.50$ ,  $p=.070$ ,  $\eta_p^2=.09$ ). Thus, when  
270 prosociality was disadvantageous for the participants, responses in the CTL group were slower than in the  
271 NPD group.

272 Last, the option to punish did not impact reaction times across groups (ANOVA with factors  
273 punishment [noPUN, PUN] and group [CTL, NPD]:  $F(1,35)=0.00$ ,  $p=.983$ ,  $\eta_p^2=.00$ ). Again, the CTL group  
274 responded slower than the NPD group (main effect of group:  $F(1,35)=8.30$ ,  $p=.007$ ,  $\eta_p^2=.19$ ), which was due  
275 to noPUN trials (CTL>NPD:  $t(43.2)=3.06$ ,  $p_{\text{Holm}}=.023$ ). No significant interaction was found  
276 (punishment\*group:  $F(1,35)=1.06$ ,  $p=.311$ ,  $\eta_p^2=.03$ ).

277  
278 **Conflict-Related Neural Activity During Prosocial Decision Making Was Reduced in NPD Group**  
279 Across groups, presence of motivational conflict (Choice>BL) elicited activity in right dorsal midcingulate  
280 cortex (MNI x,y,z: 6,30,42;  $T=5.79$ ,  $k=68$ ,  $p_{\text{FWE}}=.001$ ; whole-brain), right dorsolateral prefrontal cortex  
281 (dlPFC; 46,34,22;  $T=6.45$ ,  $k=146$ ,  $p_{\text{FWE}}<.001$ ), bilateral parietal cortex (right: 28,-60,44;  $T=9.32$ ,  $k=1833$ ,  
282  $p_{\text{FWE}}<.001$ ; left: -26,-70,32;  $T=9.63$ ,  $k=1349$ ,  $p_{\text{FWE}}<.001$ ), and further regions (see Supplementary  
283 Information for full activation coordinates). This effect was stronger for the CTL than the NPD group in left  
284 dorsomedial prefrontal cortex (dmPFC; -6,30,38;  $T=3.86$ ,  $k=29$ ,  $p_{\text{FWE}}=.023$ ) and left preSMA (-4,12,52;  
285  $T=4.44$ ,  $k=10$ ,  $p_{\text{FWE}}=.003$ ; -corrected inside the *conflict* mask, Figure 4), while the opposite comparison (i.e.  
286 Choice>BL \* NPD>CTL) did not yield any significant results, indicating that considering potential  
287 interpersonal consequences is linked to conflict-related neural activity particularly in the CTL group.

288 Contrasting HC against the average of LC and MC (HC>LC&MC) to test for effects of increasing  
289 motivational conflict on neural activity did not yield any significant effects or interactions.

290 When selfish behavior required punishing others (PUN>noPUN), activity increased in right AG (34,-  
291 68,52;  $T=5.35$ ,  $k=73$ ,  $p_{\text{FWE}}=.006$ ; whole-brain), right inferior temporal gyrus (ITG; 54,-56,-10;  $T=5.24$ ,  $k=19$ ,  
292  $p_{\text{FWE}}=.009$ ), and right superior parietal cortex (26,-72,54;  $T=4.84$ ,  $k=1$ ,  $p_{\text{FWE}}=.043$ ). The effect in right ITG  
293 was significant when performing this analysis in the CTL group alone (48,-56,-8;  $T=5.20$ ,  $k=33$ ,  $p_{\text{FWE}}=.004$ ;  
294 whole-brain), which also showed significantly stronger activations for PUN vs noPUN trials in left AI (-  
295 32,18,-14;  $T=5.25$ ,  $k=14$ ,  $p_{\text{FWE}}=.009$ ), right inferior frontal gyrus (50,20,16;  $T=4.89$ ,  $k=3$ ,  $p_{\text{FWE}}=.037$ ), and right  
296 middle temporal gyrus (62,-44,2;  $T=5.26$ ,  $k=35$ ,  $p_{\text{FWE}}=.008$ ). However, despite no significant effects in the

297 NPD group, PUN>noPUN did not differ between groups. Hence, when selfish behavior was possible only  
298 by punishing others, this induced stronger activity in brain regions like right AG and ITG, which was driven  
299 by the CTL group.

300

### 301 **Opportunities to Punish Increased Conflict-Related Neural Activity Across Groups**

302 To predict task-related neural activity with individual differences in prosociality, we regressed the first-  
303 level Choice>BL contrast images on the participants' mean percentages of prosocial choices while  
304 controlling for group differences. Across groups, higher prosociality predicted increasing activity in right  
305 dlPFC (36,38,14;  $T=5.80$ ,  $k=3$ ,  $p_{FWE}=.040$ ; whole-brain), but no group differences were found. Regressing  
306 the contrast HC>LC&MC on the corresponding difference in prosociality (i.e., HC minus LC&MC) did not  
307 yield any significant effects. However, increasing prosociality from noPUN to PUN trials predicted  
308 corresponding increases in neural activity in right SMA (6,6,48;  $T=6.16$ ,  $k=3$ ,  $p_{FWE}=.018$ ; whole-brain) across  
309 groups. Thus, higher overall prosociality predicted neural activity in right dlPFC, and increased prosociality  
310 in order not to punish others was linked to increased SMA activity across groups.

311 Since participants in the NPD group showed low overall prosociality and responded more slowly  
312 during prosocial than during selfish choices, we expected stronger trial-by-trial conflict-related neural  
313 activity for prosocial choices in the NPD than in the CTL group[34,36,39], but no such effect was found.

314

### 315 **Reaction Times Predicted Conflict-Related Neural Activity Within and Across Participants**

316 Last, under motivational conflict, slower participants showed higher activity in right mid cingulate gyrus  
317 (Choice>BL: 4,32,36;  $T=5.37$ ,  $k=53$ ,  $p_{FWE}=.001$ ; corrected inside the *conflict* mask), left AI (-38,18,2;  $T=5.87$ ,  
318  $k=22$ ,  $p_{FWE}<.001$ ), and left SMA (-4,14,50;  $T=5.37$ ,  $k=111$ ,  $p_{FWE}=.001$ ). Similarly, slower RTs due to increasing  
319 conflict were associated with higher neural activity in SMA (HC>LC&MC: 2,16,44;  $T=6.56$ ,  $k=224$ ,  $p_{FWE}<.001$ ;  
320 corrected inside the *conflict* mask), and left (-32,16,2;  $T=5.9$ ,  $k=16$ ,  $p_{FWE}<.001$ ) and right AI (40,16,0;  $T=4.73$ ,  
321  $k=6$ ,  $p_{FWE}=.008$ ). Additionally, slower trial-by-trial RTs predicted neural activity in ACC, bilateral AI, and

322 lateral prefrontal and parietal cortices, and an exploratory *F*-test indicated that trial-by-trial RTs were less  
323 predictive of mid cingulate neural activity in the NPD than in the CTL group (-6,26,36;  $F=18.05$ ,  $k=1$ ,  
324  $p_{FWE}=.048$ ; corrected inside the *conflict* mask).

325 **Discussion**

326 In the present study we investigated how prosocial decision making and underlying neural processes in  
327 patients diagnosed with NPD are shaped by conflicting interpersonal motives. Compared to control  
328 subjects, the NPD group behaved less prosocially, responded faster, and showed less neural activity in  
329 regions associated with conflict monitoring such as the SMA and cingulate cortex[38,39]. When  
330 prosociality was disadvantageous for the participants, it diminished in both groups, although control  
331 subjects still behaved more prosocially than the NPD group. Both groups were similarly affected by the  
332 requirement to punish others for one's own benefit, which shifted behavior away from selfishness, and  
333 increased neural activity in right AG and ITG. Last, when participants in the NPD group acted prosocially,  
334 thus deviating from their selfish mode of behavior, this slowed responding to a level comparable to the  
335 CTL group.

336 Our finding of low generosity in participants diagnosed with NPD is well in line with existing  
337 literature from non-clinical narcissistic samples[27,28]. We hypothesized that this may either result from  
338 more readily available tendencies towards selfishness[35] or, alternatively, from cognitively effortful  
339 arbitration between conflicting interpersonal motives; i.e. either to selfishly increase one's own gain or to  
340 behave prosocially in order to be seen in a good light by others[9,10]. Our findings speak to the former  
341 hypothesis, as the mainly selfish responses in the NPD group were generally fast, which was paralleled by  
342 comparably low conflict-related neural activity[38,39], and rare prosocial choices were considerably  
343 slower. Participants in the CTL group more readily utilized the fairness information provided in each trial  
344 to guide their decisions, causing motivational conflict and the need to engage in cognitive control[34,39].  
345 In sum, our data nicely coincide with earlier research showing that deviations from selfish or prosocial  
346 habits are marked by slowing RTs[36]. Thus, using response times one may reveal individual differences in  
347 social value orientations[35], with participants in the NPD group being more strongly oriented toward  
348 selfishness.



349           Notably, behavior in the NPD group was not fully insensitive to its potential social consequences.  
350    Similar to the CTL group, participants in the NPD group acted more selfishly when prosociality was believed  
351    to be highly detrimental, and acted more prosocially when their own benefit was conditional on punishing  
352    others. Prosocial behavior can be shaped by inducing prosocial motives[58], and explicit instructions to  
353    consider others' perspectives can increase prosocial responding in non-clinical narcissistic individuals[69].  
354    Although we did not provide such explicit instructions, our task was effective for pitting selfish against  
355    prosocial motives. Notably, recipients were anonymous, which is known to impact behavior in prosocial  
356    decision games[70], and did not have an option to reciprocate, invalidating any potential economic  
357    repercussions of unfair behavior. Despite these circumstances, patients diagnosed with NPD showed some  
358    responsiveness to others' potential needs, underlining that pathological narcissism does not equate to an  
359    absolute incapacity, but perhaps a reduced propensity to act prosocially[71]. This finding points to the  
360    potential of empathy interventions to increase perspective taking[72] for increasing prosocial  
361    behavior[58], which could be reflected in neural activity in networks mediating interpersonal  
362    motivations[32,58,71]. Such interventions could entail practicing to actively consider how one's social  
363    behavior affects others, and to imagine how others will respond during interpersonal interactions. In  
364    consequence, such therapeutic interventions could elicit higher prosociality and more favorable  
365    evaluations from others, stabilizing self-esteem[46,73] and overall well-being[74].

366           Our findings also speak to neural underpinnings of prosociality more generally. Precisely, neural  
367    activity in SMA, which is linked to cognitive control of behavior[38], was higher for participants who  
368    favored prosociality over punishing others for their own benefit. When such punishment was possible, this  
369    increased activity in AG, which may reflect more specifically social-cognitive processes like moral  
370    reasoning[55], or domain-general cognitive processes like attentional reorienting[75] that may also be  
371    engaged during social behavior. In addition, ITG was activated when punishment was possible, which has  
372    previously been associated with fairness considerations[42]. Last, participants with higher overall levels of  
373    prosociality showed increased activity in dlPFC, which was also responsive to the general presence of

374 conflicting interpersonal motives, alongside other regions of the cognitive control network (i.e. dmPFC, AI,  
375 ACC, SMA, and parietal cortex).

376           So far, few studies have investigated the neural correlates of interpersonal behavior in NPD using  
377 experimental paradigms in combination with fMRI. By doing so, our data contribute to a more detailed  
378 understanding of NPD in terms of impairments in interpersonal functioning, as introduced by DSM-5,  
379 section 3 [1]. Collectively, our data indicate that selfish behavior in NPD relies on diminished consideration  
380 of prosocial motives, which obviates the need to resolve conflict with selfish tendencies. However, this  
381 may reflect a reduced propensity, not ability, to act prosocially[69,71]. Potentially, this reflects differences  
382 between NPD and, for instance, antisocial personality disorder, which could be tested explicitly in future  
383 studies. In terms of treatment implications, our results point to possibilities for enhancing prosocial  
384 behavior and thereby improving social relationships and well-being in NPD. Regarding social cognition and  
385 interpersonal behavior more broadly, our findings support the notion that these functions rely on domain-  
386 general control processes [38–40], that draw on contextual social information to decide between generous  
387 or selfish behavior[43].

388 **Acknowledgements**

389 We would like to thank Sylvia Richter and Thomas Münte for helpful discussions during  
390 development of the task and Michael Scholz for his help with the optimization of the trial sequence for the  
391 fMRI task. We further thank Jürgen Baudewig, Ricardo Heydenblut, and Christian Kainz for assistance with  
392 MRI data acquisition. Research leading to this publication has been funded by the Deutsche  
393 Forschungsgemeinschaft (Sören Krach; KR 3803/9-1; Aline Vater and Stefan Roepke; EXC 302; Björn Schott;  
394 SFB 779, TP A08).

395

396 **Disclosures**

397 The authors declare no conflicts of interest.

398

399 **Supplementary Information**

400 Supplementary information is available at MP's website.

401  
402  
403  
404  
405  
406  
407  
408  
409  
410  
411  
412  
413  
414  
415  
416  
417  
418  
419  
420  
421  
422  
423  
424  
425

## References

1. American Psychiatric Association (2013): *Diagnostic and Statistical Manual of Mental Disorders*, 5th ed. Washington, DC: American Psychiatric Association.  
<https://doi.org/10.1176/appi.books.9780890425596>
2. Roepke S, Vater A (2014): Narcissistic personality disorder: An integrative review of recent empirical data and current definitions. *Curr Psychiatry Rep* 16. <https://doi.org/10.1007/s11920-014-0445-0>
3. Cain NM, Pincus AL, Ansell EB (2008): Narcissism at the crossroads: Phenotypic description of pathological narcissism across clinical theory, social/personality psychology, and psychiatric diagnosis. *Clin Psychol Rev* 28: 638–656.
4. Koepnik T, Jauk E, Kanske P (2021): Lay theories of grandiose and vulnerable narcissism. *Curr Psychol*. <https://doi.org/10.1007/s12144-020-01296-w>
5. Morf CC, Rhodewalt F (2001): Unraveling the paradoxes of narcissism: A dynamic self-regulatory processing model. *Psychol Inq* 12: 177–196.
6. Campbell WK, Foster JD (2007): The Narcissistic Self: Background, an Extended Agency Model, and Ongoing Controversies. In: Sedikides C, Spencer J, editors. *The Self*. New York: Psychology Press, pp 115–138.
7. Farwell L, Wohlwend-Lloyd R (1998): Narcissistic Processes: Optimistic Expectations, Favorable Self-Evaluations, and Self-Enhancing Attributions. *J Pers* 66: 65–83.
8. Paulhus DL, Williams KM (2002): The Dark Triad of personality: Narcissism, Machiavellianism, and psychopathy. *J Res Pers* 36: 556–563.
9. Back MD, Kufner ACP, Dufner M, Gerlach TM, Rauthmann JF, Denissen JJA (2013): Narcissistic admiration and rivalry: Disentangling the bright and dark sides of narcissism. *J Pers Soc Psychol* 105: 1013–1037.
10. Hart W, Adams J, Burton KA, Tortoriello GK (2017): Narcissism and self-presentation: Profiling grandiose and vulnerable Narcissists' self-presentation tactic use. *Pers Individ Dif* 104: 48–57.

- 426 11. Campbell WK, Brunell AB, Finkel EJ (2006): Narcissism, Interpersonal Self-Regulation, and Romantic  
427 Relationships: An Agency Model Approach. In: Vohs KD, Finkel EJ, editors. *Self and Relationships:  
428 Connecting Intrapersonal and Interpersonal Processes*. New York, NY: Guilford Press, pp 57–83.
- 429 12. Paulhus DL (1998): Interpersonal and intrapsychic adaptiveness of trait self-enhancement: A mixed  
430 blessing? *J Pers Soc Psychol* 74: 1197–1208.
- 431 13. Stucke TS, Sporer SL (2002): When a grandiose self-image is threatened: Narcissism and self-concept  
432 clarity as predictors of negative emotions and aggression following ego-threat. *J Pers* 70: 509–532.
- 433 14. Ferriday C, Vartanian O, Mandel DR (2011): Public but not private ego threat triggers aggression in  
434 narcissists. *Eur J Soc Psychol* 41: 564–568.
- 435 15. Dickinson KA, Pincus AL (2003): Interpersonal Analysis of Grandiose and Vulnerable Narcissism. *J Pers  
436 Disord* 17: 188–207.
- 437 16. Fatfouta R, Gerlach TM, Schröder-Abé M, Merkl A (2015): Narcissism and lack of interpersonal  
438 forgiveness: The mediating role of state anger, state rumination, and state empathy. *Pers Individ Dif*  
439 75: 36–40.
- 440 17. Wurst SN, Gerlach TM, Dufner M, Rauthmann JF, Grosz MP, Küfner ACP, *et al.* (2017): Narcissism and  
441 romantic relationships: The differential impact of narcissistic admiration and rivalry. *J Pers Soc  
442 Psychol* 112: 280–306.
- 443 18. Sauls D, Zeigler-Hill V, Vrabel JK, Lehtman MJ (2019): How do narcissists get what they want from  
444 their romantic partners? The connections that narcissistic admiration and narcissistic rivalry have  
445 with influence strategies. *Pers Individ Dif* 147: 33–42.
- 446 19. Miller JD, Hoffman BJ, Gaughan ET, Gentile B, Maples J, Keith Campbell W (2011): Grandiose and  
447 Vulnerable Narcissism: A Nomological Network Analysis. *J Pers* 79: 1013–1042.
- 448 20. Crowe ML, Edershile EA, Wright AGC, Campbell WK, Lynam DR, Miller JD (2018): Development and  
449 validation of the Narcissistic Vulnerability Scale: An adjective rating scale. *Psychol Assess* 30: 978–  
450 983.

- 451 21. Pincus AL, Ansell EB, Pimentel CA, Cain NM, Wright AGC, Levy KN (2009): Initial Construction and  
452 Validation of the Pathological Narcissism Inventory. *Psychol Assess* 21: 365–379.
- 453 22. Vater A, Schröder-Abé M, Ritter K, Renneberg B, Schulze L, Bosson JK, Roepke S (2013): The  
454 Narcissistic Personality Inventory: A Useful Tool for Assessing Pathological Narcissism? Evidence  
455 From Patients With Narcissistic Personality Disorder. *J Pers Assess* 95: 301–308.
- 456 23. Aslinger EN, Manuck SB, Pilkonis PA, Simms LJ, Wright AGC (2018): Narcissist or narcissistic?  
457 Evaluation of the latent structure of narcissistic personality disorder. *J Abnorm Psychol* 127: 496–  
458 502.
- 459 24. Ritter K, Dziobek I, Preißler S, Rüter A, Vater A, Fydrich T, *et al.* (2011): Lack of empathy in patients  
460 with narcissistic personality disorder. *Psychiatry Res* 187: 241–247.
- 461 25. Schulze L, Dziobek I, Vater A, Heekeren HR, Bajbouj M, Renneberg B, *et al.* (2013): Gray matter  
462 abnormalities in patients with narcissistic personality disorder. *J Psychiatr Res* 47: 1363–1369.
- 463 26. Miller JD, Campbell WK, Pilkonis PA (2007): Narcissistic personality disorder: relations with distress  
464 and functional impairment. *Compr Psychiatry* 48: 170–177.
- 465 27. Campbell WK, Bush CP, Brunell AB, Shelton J (2005): Understanding the social costs of narcissism:  
466 The case of the tragedy of the commons. *Personal Soc Psychol Bull* 31: 1358–1368.
- 467 28. Böckler A, Sharifi M, Kanske P, Dziobek I, Singer T (2017): Social decision making in narcissism:  
468 Reduced generosity and increased retaliation are driven by alterations in perspective-taking and  
469 anger. *Pers Individ Dif* 104: 1–7.
- 470 29. Bushman BJ, Baumeister RF (1998): Threatened Egotism, Narcissism, Self-Esteem, and Direct and  
471 Displaced Aggression: Does Self-Love or Self-Hate Lead to Violence. *J Pers Soc Psychol* 75: 219–229.
- 472 30. Tusche A, Böckler A, Kanske P, Trautwein F-M, Singer T (2016): Decoding the Charitable Brain:  
473 Empathy, Perspective Taking, and Attention Shifts Differentially Predict Altruistic Giving. *J Neurosci*  
474 36: 4719–4732.
- 475 31. Paciello M, Fida R, Cerniglia L, Tramontano C, Cole E (2013): High cost helping scenario: The role of

- 476 empathy, prosocial reasoning and moral disengagement on helping behavior. *Pers Individ Dif* 55: 3–  
477 7.
- 478 32. Gallo S, Paracampo R, Müller-Pinzler L, Severo MC, Blömer L, Fernandes-Henriques C, *et al.* (2018):  
479 The causal role of the somatosensory cortex in prosocial behaviour. *Elife* 7: 1–31.
- 480 33. Carlo G, Mestre MV, Samper P, Tur A, Armenta BE (2010): Feelings or cognitions? Moral cognitions  
481 and emotions as longitudinal predictors of prosocial and aggressive behaviors. *Pers Individ Dif* 48:  
482 872–877.
- 483 34. Evans AM, Dillon KD, Rand DG (2015): Fast But Not Intuitive, Slow But Not Reflective: Decision  
484 Conflict Drives Reaction Times in Social Dilemmas. *J Exp Psychol Gen* 144: 951–966.
- 485 35. Cornelissen G, Dewitte S, Warlop L (2011): Are Social Value Orientations Expressed Automatically?  
486 Decision Making in the Dictator Game. *Personal Soc Psychol Bull* 37: 1080–1090.
- 487 36. Yamagishi T, Matsumoto Y, Kiyonari T, Takagishi H, Li Y, Kanai R, Sakagami M (2017): Response time  
488 in economic games reflects different types of decision conflict for prosocial and proself individuals.  
489 *Proc Natl Acad Sci* 114: 6394–6399.
- 490 37. Hutcherson CA, Bushong B, Rangel A (2015): A Neurocomputational Model of Altruistic Choice and Its  
491 Implications. *Neuron* 87: 451–462.
- 492 38. Nachev P, Kennard C, Husain M (2008): Functional role of the supplementary and pre-supplementary  
493 motor areas. *Nat Rev Neurosci* 9: 856–869.
- 494 39. Botvinick MM, Cohen JD, Carter CS (2004): Conflict monitoring and anterior cingulate cortex: An  
495 update. *Trends Cogn Sci* 8: 539–46.
- 496 40. Bonini F, Burle B, Liegeois-Chauvel C, Regis J, Chauvel P, Vidal F (2014): Action Monitoring and Medial  
497 Frontal Cortex: Leading Role of Supplementary Motor Area. *Science (80- )* 343: 888–891.
- 498 41. Cutler J, Campbell-Meiklejohn D (2019): A comparative fMRI meta-analysis of altruistic and strategic  
499 decisions to give. *Neuroimage* 184: 227–241.
- 500 42. Feng C, Luo YJ, Krueger F (2015): Neural signatures of fairness-related normative decision making in

- 501 the ultimatum game: A coordinate-based meta-analysis. *Hum Brain Mapp* 36: 591–602.
- 502 43. Zaki J, Hennigan K, Weber J, Ochsner KN (2010): Social cognitive conflict resolution: Contributions of  
503 domain-general and domain-specific neural systems. *J Neurosci* 30: 8481–8488.
- 504 44. Bartra O, McGuire JT, Kable JW (2013): The valuation system: A coordinate-based meta-analysis of  
505 BOLD fMRI experiments examining neural correlates of subjective value. *Neuroimage* 76: 412–427.
- 506 45. Stolz DS, Müller-Pinzler L, Krach S, Paulus FM (2020): Internal control beliefs shape positive affect and  
507 associated neural dynamics during outcome valuation. *Nat Commun* 11: 1230.
- 508 46. Will G-J, Rutledge RB, Moutoussis M, Dolan RJ (2017): Neural and computational processes  
509 underlying dynamic changes in self-esteem. *Elife* 6: 1–21.
- 510 47. Eisenberger NI, Inagaki TK, Muscatell K a., Byrne Haltom KE, Leary MR (2011): The Neural Sociometer:  
511 Brain Mechanisms Underlying State Self-esteem. *J Cogn Neurosci* 23: 3448–3455.
- 512 48. Tricomi E, Rangel A, Camerer CF, O’Doherty JP (2010): Neural evidence for inequality-averse social  
513 preferences. *Nature* 463: 1089–1091.
- 514 49. Aoki R, Matsumoto M, Yomogida Y, Izuma K, Murayama K, Sugiura A, *et al.* (2014): Social equality in  
515 the number of choice options is represented in the ventromedial prefrontal cortex. *J Neurosci* 34:  
516 6413–6421.
- 517 50. Strombach T, Weber B, Hangebrauk Z, Kenning P, Karipidis II, Tobler PN, Kalenscher T (2014): Social  
518 discounting involves modulation of neural value signals by temporoparietal junction. *Proc Natl Acad*  
519 *Sci* 112: 1619–1624.
- 520 51. Park SQ, Kahnt T, Dogan A, Strang S, Fehr E, Tobler PN (2017): A neural link between generosity and  
521 happiness. *Nat Commun* 8: 15964.
- 522 52. Schurz M, Tholen MG, Perner J, Mars RB, Sallet J (2017): Specifying the brain anatomy underlying  
523 temporo-parietal junction activations for theory of mind: A review using probabilistic atlases from  
524 different imaging modalities. *Hum Brain Mapp* 38: 4788–4805.
- 525 53. Decety J, Lamm C (2007): The role of the right temporoparietal junction in social interaction: How



- 526 low-level computational processes contribute to meta-cognition. *Neuroscientist* 13: 580–593.
- 527 54. Saxe R, Kanwisher N (2003): People thinking about thinking people: The role of the temporo-parietal  
528 junction in “theory of mind.” *Neuroimage* 19: 1835–1842.
- 529 55. Young L, Camprodon JA, Hauser M, Pascual-Leone A, Saxe R (2010): Disruption of the right  
530 temporoparietal junction with transcranial magnetic stimulation reduces the role of beliefs in moral  
531 judgments. *Proc Natl Acad Sci* 107: 6753–6758.
- 532 56. A.D. Craig (2002): How do you feel? Interoception: the sense of the physiological condition of the  
533 body. *Nat Rev Neurosci* 3: 655–666.
- 534 57. Kanske P, Böckler A, Trautwein FM, Singer T (2015): Dissecting the social brain: Introducing the  
535 EmpaToM to reveal distinct neural networks and brain-behavior relations for empathy and Theory  
536 of Mind. *Neuroimage* 122: 6–19.
- 537 58. Hein G, Morishima Y, Leiberg S, Sul S, Fehr E (2016): The brain’s functional network architecture  
538 reveals human motives. *Science (80- )* 351: 84–90.
- 539 59. First M, Spitzer R, Gibbon M, Williams JBW (1996): *Structured Clinical Interview for DSM-IV Axis I*  
540 *Disorders (SCID-I)*. New York: New York State Psychiatric Institute, Biometrics Research Department.
- 541 60. First MB, Gibbon M, Spitzer RL, Williams JBW, Benjamin L (1997): *Structured Clinical Interview for*  
542 *DSM–IV Personality Disorders (SCID–II)*. Washington, DC: American Psychiatric Press.
- 543 61. Wittchen HU, Zaudig M, Fydrich T (1997): *SKID-I - Strukturiertes Klinisches Interview Für DSM–IV–TR -*  
544 *Achse I [Structured Clinical Interview for DSM–IV–TR - Axis I]*. Göttingen: Hogrefe.
- 545 62. Fydrich T, Renneberg B, Schmitz B, Wittchen H-U (1997): *SKID-II - Strukturiertes Klinisches Interview*  
546 *Für DSM–IV Achse II: Persönlichkeitsstörungen [SCID II, Structured Clinical Interview for DSM–IV Axis*  
547 *II: Personality Disorders]*. Göttingen: Hogrefe.
- 548 63. Ritter K, Vater A, Rüscher N, Schröder-Abé M, Schütz A, Fydrich T, *et al.* (2014): Shame in patients with  
549 narcissistic personality disorder. *Psychiatry Res* 215: 429–437.
- 550 64. JASP Team (2019): JASP (Version 0.11.1).

- 551 65. The jamovi project (2020): jamovi [no. 1.2]. Retrieved from <https://www.jamovi.org>
- 552 66. R Core Team (2013): R: A language and environment for statistical computing. Vienna, Austria,  
553 Austria: R Foundation for Statistical Computing.
- 554 67. Ashburner J, Barnes G, Chen C, Daunizeau J, Moran R, Henson R, *et al.* (, February): SPM12 Manual.  
555 <https://doi.org/10.1111/j.1365-294X.2006.02813.x>
- 556 68. Yarkoni T, Poldrack RA, Nichols TE, Van Essen DC, Wager TD (2011): Large-scale automated synthesis  
557 of human functional neuroimaging data. *Nat Methods* 8: 665–670.
- 558 69. Hepper EG, Hart CM, Sedikides C (2014): Moving Narcissus: Can Narcissists Be Empathic? *Personal*  
559 *Soc Psychol Bull* 40: 1079–1091.
- 560 70. Eckel CC, Grossman PJ (1996): Altruism in anonymous dictator games. *Games Econ Behav* 16: 181–  
561 191.
- 562 71. Meffert H, Gazzola V, Den Boer JA, Bartels AAJ, Keysers C (2013): Reduced spontaneous but relatively  
563 normal deliberate vicarious representations in psychopathy. *Brain* 136: 2550–2562.
- 564 72. Weisz E, Zaki J (2017): Empathy-Building Interventions: A Review of Existing Work and Suggestions for  
565 Future Directions. In: Seppala EM, Simon-Thomas E, Brown SL, Worline MC, Cameron CD, Doty JR,  
566 editors. *The Oxford Handbook of Compassion Science*. New York: Oxford University Press, pp 205–  
567 218.
- 568 73. Leary MR (2005): Sociometer theory and the pursuit of relational value: Getting to the root of self-  
569 esteem. *Eur Rev Soc Psychol* 16: 75–111.
- 570 74. Morelli SA, Lee IA, Arnn ME, Zaki J (2015): Emotional and instrumental support provision interact to  
571 predict well-being. *Emotion* 15: 484–493.
- 572 75. Seghier ML (2013): The angular gyrus: Multiple functions and multiple subdivisions. *Neuroscientist*  
573 19: 43–61.
- 574
- 575

576 **Figure legends**

577 **Figure 1.** Structure of the experimental task. **Top.** Structure of a single trial. Following a jittered fixation  
578 (500-6500 ms), a trial was initialized for 500 ms and followed by a 3000 ms display of the two possible  
579 splits of the endowment of 1000 points (equivalent to 10€). Participants chose between options with a  
580 button press. Responses slower than 3000 ms were discarded. Player A is the participant and Player B the  
581 recipient. **Bottom.** Overview of all experimental conditions, with mean number of points assigned to each  
582 player and the preset maximum deviation from the mean assignment (max +/-). The split assigning most  
583 money to the participant was defined to be the selfish options, whereas the prosocial option was the one  
584 splitting the endowment in a relatively more beneficial way for the recipient. Note that due to this  
585 definition, the prosocial option did not necessarily assign more money to the recipient than to the  
586 participant. There were 12 different, pseudorandomized trial sequences that were designed to optimize  
587 BOLD efficiency. Thus, the number of trials in each sequence varied between 223 and 229 (see text for  
588 details).

589  
590 **Figure 2.** Behavioral data. **a.** Percentages of prosocial choices for the CTL group and NPD group overall  
591 (left), for trials with low and medium (LC&MC) vs high motivational conflict (HC; middle), and separately  
592 for trials without (noPUN: MC, HC), and with punishment (PUN: MCP, HCP). **b.** Median reaction times in  
593 seconds for BL and Choice trials (left), for LC&MC trials and HC trials (middle), and separately for PUN and  
594 noPUN trials. Where shown, small crossed bars represent interaction between group (CTL, NPD) and factor  
595 on x-axis. Central bars of boxplots show median, lower and upper box borders show 25<sup>th</sup> and 75<sup>th</sup>  
596 percentile and whiskers end at last data point within 1.5 times the interquartile range from lower or upper  
597 box border.

598  
599

600 **Figure 3.** Reaction times separated by decision. Small crossed bar represents interaction between group  
601 (CTL, NPD) and decision made (selfish, prosocial). Small crossed bars represents interaction between group  
602 (CTL, NPD) and choice (selfish, prosocial). Central bars of boxplots show median, lower and upper box  
603 borders show 25<sup>th</sup> and 75<sup>th</sup> percentile and whiskers end at last data point within 1.5 times the interquartile  
604 range from lower or upper box border.

605

606 **Figure 4.** Neural activity during the experimental task. **a.** Neural activity in regions associated with the term  
607 *conflict* (green outline) including dorsomedial prefrontal cortex (dmPFC) and supplementary motor area  
608 (SMA) was higher for the contrast Choice>BL ( $p<.05$ , whole-brain FWE-corrected; displayed at  $p<.0001$ ,  
609 uncorrected). This effect was larger in the CTL group than in the NPD group, visualized in the bar plots.  
610 Neural activation data in bar plots are based on mean parameter estimate across all voxels in dmPFC and  
611 SMA, respectively, in which the interaction of Choice>BL \* CTL>NPD was significant at  $p<.05$ , small-volume  
612 FWE-corrected inside the *conflict* mask). **b.** Neural activity in right angular gyrus (AG) and right inferior  
613 temporal gyrus (ITG) was higher for PUN than for noPUN trials, but did not differ between groups. Bar  
614 plots show mean parameter estimates across all voxels in right AG and right ITG in which the contrast  
615 PUN>noPUN was significant at  $p<.05$ , whole-brain FWE-corrected (displayed at  $p<.005$ , uncorrected). Inset  
616 in bottom right corner depicts activation in right AG, rotated around the y axis by 45 degrees. Errorbars  
617 are +/- 1 standard error of the mean.

618

Tables

**Table 1.** Behavioral data by group and experimental condition

| Choice behavior | CTL                |                                                  |        | NPD                |                                                  |       | W     | one-sided <i>p</i> -value <sup>1</sup> | Rank-Biserial Correlation | 90% CI for Rank-Biserial Correlation |       |
|-----------------|--------------------|--------------------------------------------------|--------|--------------------|--------------------------------------------------|-------|-------|----------------------------------------|---------------------------|--------------------------------------|-------|
|                 | median % prosocial | [25 <sup>th</sup> , 75 <sup>th</sup> percentile] |        | median % prosocial | [25 <sup>th</sup> , 75 <sup>th</sup> percentile] |       |       |                                        |                           | Lower                                | Upper |
| Overall         | 45.20              | 35.30                                            | 70.03  | 9.80               | 1.38                                             | 25.51 | 260.5 | .003                                   | 0.52                      | 0.26                                 | 0.72  |
| LC              | 53.49              | 17.58                                            | 79.18  | 4.65               | 0                                                | 28.33 | 246   | .046                                   | 0.44                      | 0.15                                 | 0.66  |
| MC              | 53.33              | 29.35                                            | 88.04  | 2.30               | 0                                                | 19.99 | 273.5 | .005                                   | 0.60                      | 0.36                                 | 0.77  |
| HC              | 15.22              | 4.35                                             | 30.00  | 0.00               | 0                                                | 22.23 | 229   | .046                                   | 0.34                      | 0.04                                 | 0.59  |
| MCP             | 95.65              | 45.65                                            | 100.00 | 18.22              | 0                                                | 85.87 | 242   | .046                                   | 0.42                      | 0.13                                 | 0.64  |
| HCP             | 79.17              | 37.47                                            | 97.83  | 7.03               | 0                                                | 79.19 | 245   | .046                                   | 0.43                      | 0.15                                 | 0.65  |

  

| Reaction times | CTL       |           | NPD       |           | <i>t</i> | <i>df</i> | two-sided <i>p</i> -value <sup>1</sup> | <i>d</i> | 95% CI for <i>d</i> |       |
|----------------|-----------|-----------|-----------|-----------|----------|-----------|----------------------------------------|----------|---------------------|-------|
|                | Mean (ms) | <i>SD</i> | Mean (ms) | <i>SD</i> |          |           |                                        |          | Lower               | Upper |
| Overall        | 1138.63   | 231.72    | 951.50    | 218.88    | 2.52     | 35        | .016                                   | 0.83     | 0.15                | 1.50  |
| BL             | 889.08    | 166.62    | 887.89    | 187.96    | 0.02     | 35        | .984                                   | 0.01     | -0.64               | 0.65  |
| LC             | 1180.98   | 262.65    | 1060.97   | 283.77    | 1.34     | 35        | .571                                   | 0.44     | -0.22               | 1.09  |
| MC             | 1164.63   | 301.72    | 950.72    | 275.30    | 2.25     | 35        | .124                                   | 0.74     | 0.07                | 1.40  |
| HC             | 1310.61   | 362.42    | 976.31    | 258.75    | 3.21     | 35        | .017                                   | 1.06     | 0.36                | 1.74  |
| MCP            | 1096.95   | 234.73    | 993.14    | 359.65    | 1.05     | 35        | .606                                   | 0.34     | -0.31               | 1.00  |
| HCP            | 1393.84   | 414.36    | 1007.19   | 374.47    | 2.97     | 35        | .027                                   | 0.98     | 0.29                | 1.66  |

**Note.** CTL=Control group. NPD=Group diagnosed with Narcissistic Personality Disorder. CI=confidence interval. LC=Low Conflict. MC=Medium Conflict. HC=High Conflict. MCP=Medium Conflict Punishment. HCP=High Conflict Punishment.

<sup>1</sup>*p*-values for individual conditions (i.e. not "Overall") are Holm-corrected.

619

620

Figures

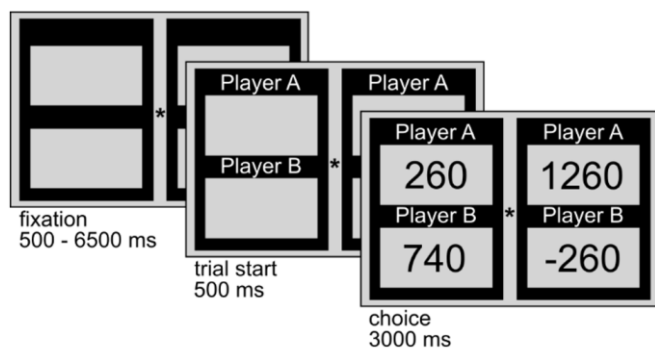

| baseline trials            |     |             | mean           | max +/- | mean             | max +/- |
|----------------------------|-----|-------------|----------------|---------|------------------|---------|
| baseline                   | BL  | participant | 500            |         | 500              |         |
|                            |     | recipient   | 500            | 0       | 500              | 0       |
| non baseline trials        |     |             | selfish option |         | prosocial option |         |
| trialtype                  |     |             | mean           | max +/- | mean             | max +/- |
| low conflict               | LC  | participant | 600            |         | 550              |         |
|                            |     | recipient   | 400            | 20      | 450              | 20      |
| medium conflict            | MC  | participant | 800            |         | 550              |         |
|                            |     | recipient   | 200            | 60      | 450              | 20      |
| high conflict              | HC  | participant | 800            |         | 200              |         |
|                            |     | recipient   | 200            | 60      | 800              | 60      |
| medium conflict punishment | MCP | participant | 1200           |         | 550              |         |
|                            |     | recipient   | -200           | 60      | 450              | 20      |
| high conflict punishment   | HCP | participant | 1200           |         | 200              |         |
|                            |     | recipient   | -200           | 60      | 800              | 60      |

621

622 Figure 1

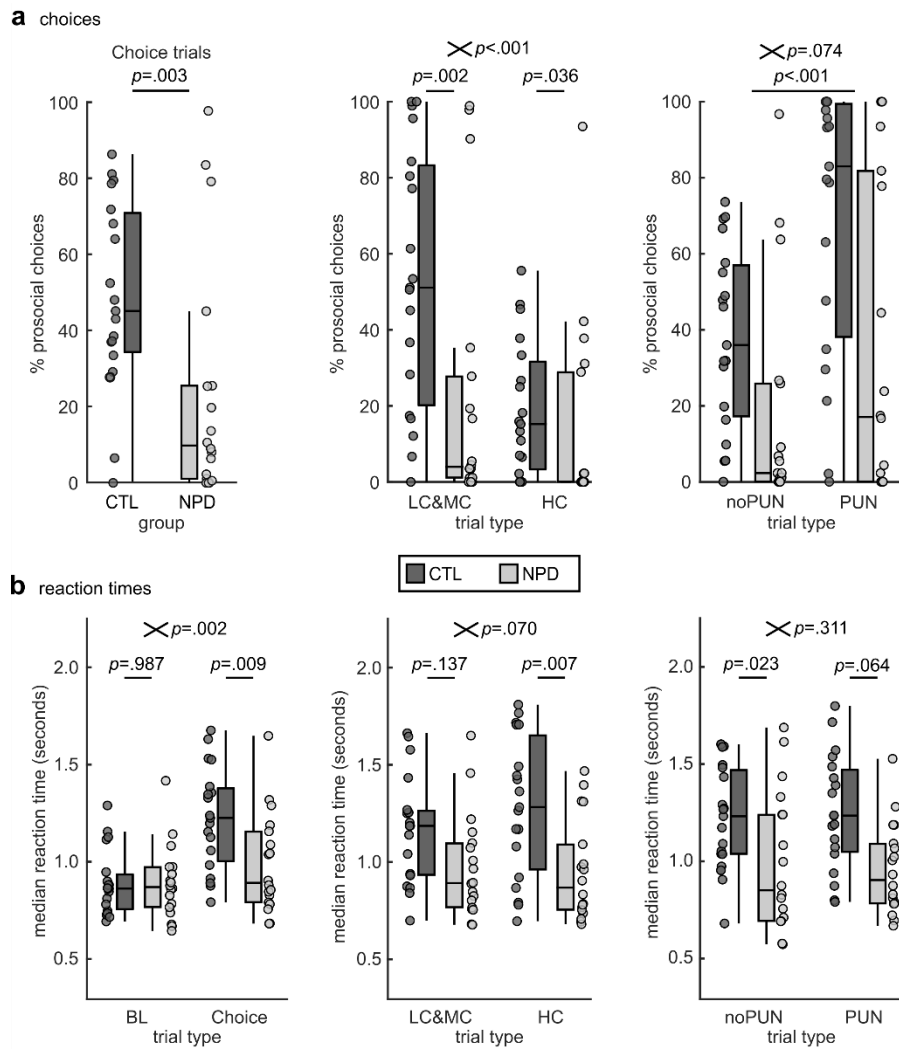

623

624 Figure 2

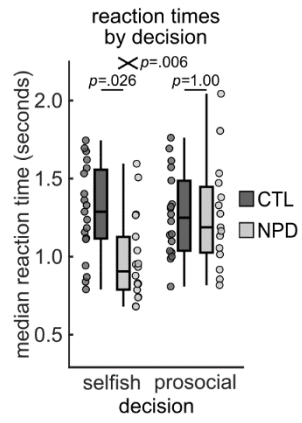

625

626 Figure 3



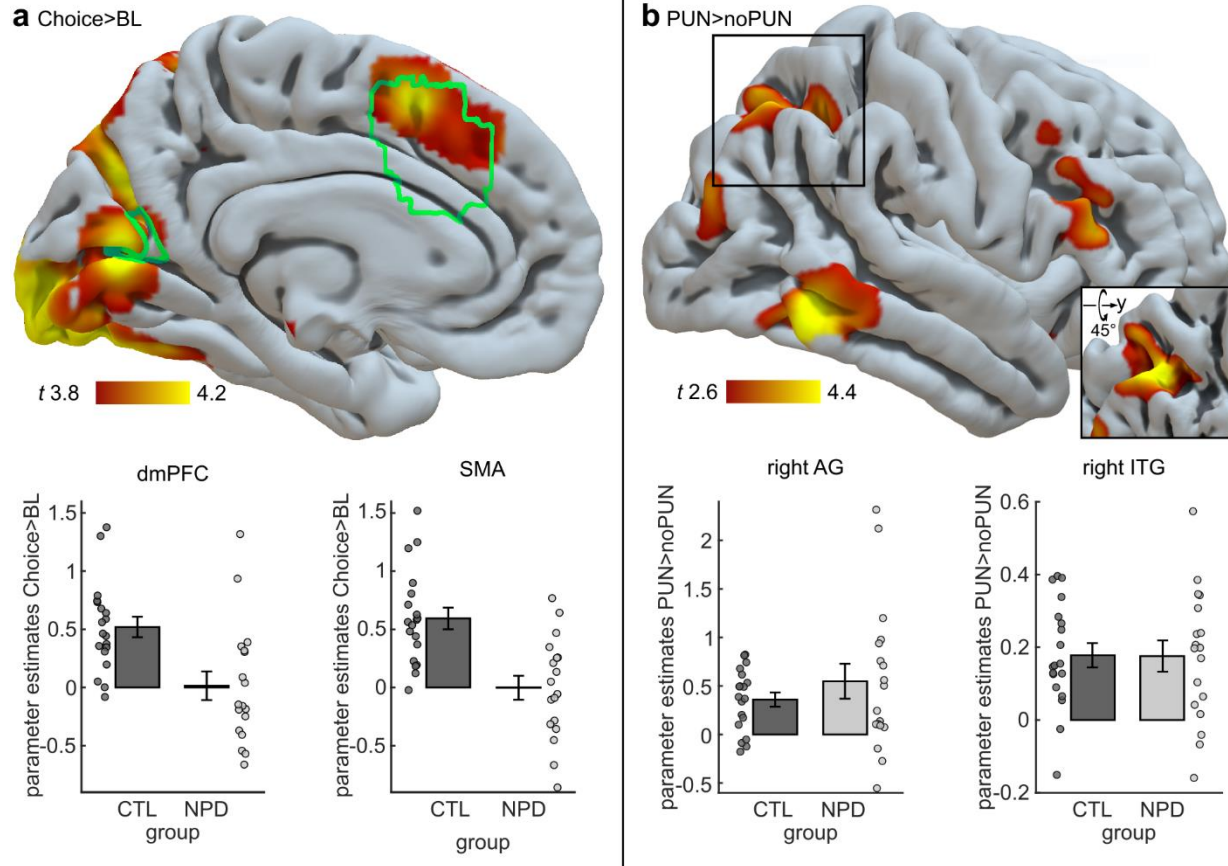

627

628 Figure 4
